# Supplementary material for: Effects of temperature and salinity on body fluid dynamics and metabolism in the estuarine Diamond-backed Terrapin (Malaclemys terrapin)
Source: Oxford University Press journal article supplement (doi:10.1242/jeb.202390), 2019-01-01
Supplement: jeb202390supp.pdf [file jeb202390supp.pdf]

Table S1

[Click here to Download Table S1](#)
